# Supplementary material for: Loss of histone macroH2A1 in hepatocellular carcinoma cells promotes paracrine-mediated chemoresistance and CD4+CD25+FoxP3+ regulatory T cells activation
Source: PubMed Central journal article supplement (PMC6929991; doi:10.7150/thno.35045), 2020-01-01
Supplement: thnov10p0910s1.pdf [file thnov10p0910s1.pdf]

**Loss of histone macroH2A1 in hepatocellular carcinoma cells promotes paracrine-mediated chemoresistance and CD4<sup>+</sup>CD25<sup>+</sup>FoxP3<sup>+</sup> regulatory T cells activation**

Oriana Lo Re<sup>1,2\*</sup>, Tommaso Mazza<sup>3\*</sup>, Sebastiano Giallongo<sup>1,2</sup>, Paola Sanna<sup>1</sup>, Francesca Rappa<sup>4</sup>, Tu Vinh Luong<sup>5</sup>, Giovanni Li Volti<sup>6</sup>, Adela Drovakova<sup>7,8</sup>, Tania Roskams<sup>9</sup>, Matthias Van Haele<sup>9</sup>, Emmanuel Tsochatzis<sup>10</sup>, Manlio Vinciguerra<sup>1,10§</sup>

<sup>1</sup> International Clinical Research Center, St' Anne's University Hospital, Brno, Czech Republic;

<sup>2</sup> Department of Biology, Faculty of Medicine, Masaryk University, Brno, Czech Republic;

<sup>3</sup> IRCCS Casa Sollievo della Sofferenza, Laboratory of Bioinformatics, San Giovanni Rotondo (FG), Italy;

<sup>4</sup> Department of Experimental Biomedicine and Clinical Neurosciences, University of Palermo, Palermo, Italy;

<sup>5</sup> Department of Histopathology, Royal Free London NHS Foundation Trust, London, United Kingdom;

<sup>6</sup> Department of Biomedical and Biotechnological Sciences, University of Catania, Catania, Italy;

<sup>7</sup> Institute of Biophysics, Academy of Sciences of the Czech Republic, Brno, Czech Republic;

<sup>8</sup> Department of Animal Physiology and Immunology, Institute of Experimental Biology, Masaryk University, Brno, Czech Republic;

<sup>9</sup> Translational Cell & Tissue Research Unit, Department of Imaging & Pathology, Katholieke Universiteit Leuven, Leuven, Belgium;

<sup>10</sup> UCL Institute for Liver and Digestive Health, Royal Free Hospital, London, United Kingdom.

## Supplementary Figures

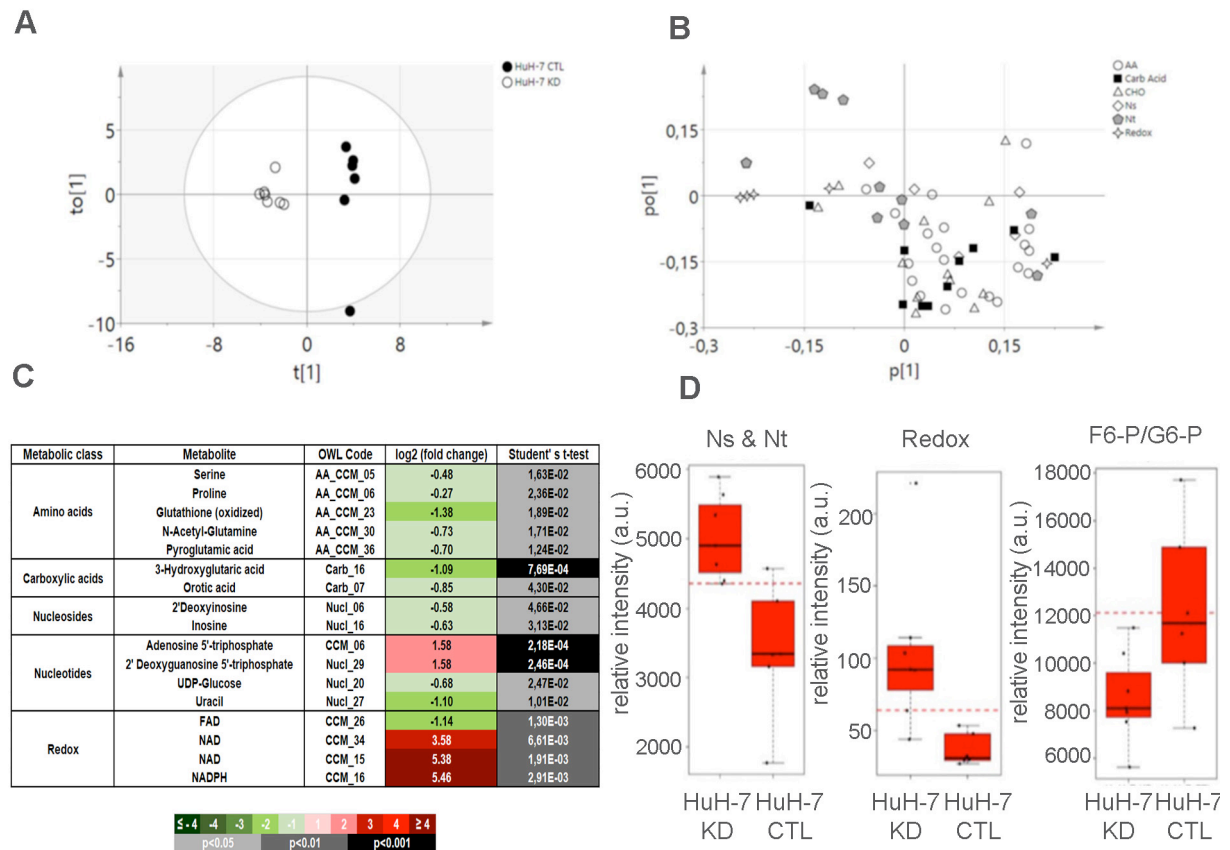

**Figure S1. Metabolomic analysis of one carbon metabolism in HCC cells.** A. Score scatter plot and B. Loading scatter plot of the OPLS-DA model of Huh-7 control (CTL) versus macroH2A1 KD cells. C. Significantly altered metabolites in Huh-7 KD compared to Huh-7 control CTL cells. FAD (Flavin adenine dinucleotide), NAD (nicotinamide adenine dinucleotide), NADP (NAD phosphate), NADPH (NADP reduced). D. Boxplots of nucleosides and nucleotides (Ns & Nt), redox electron carriers (Redox), and the ratio Fructose-6-phosphate/Glucose-6-phosphate in Huh-7 KD versus Huh-7 CTL cells.

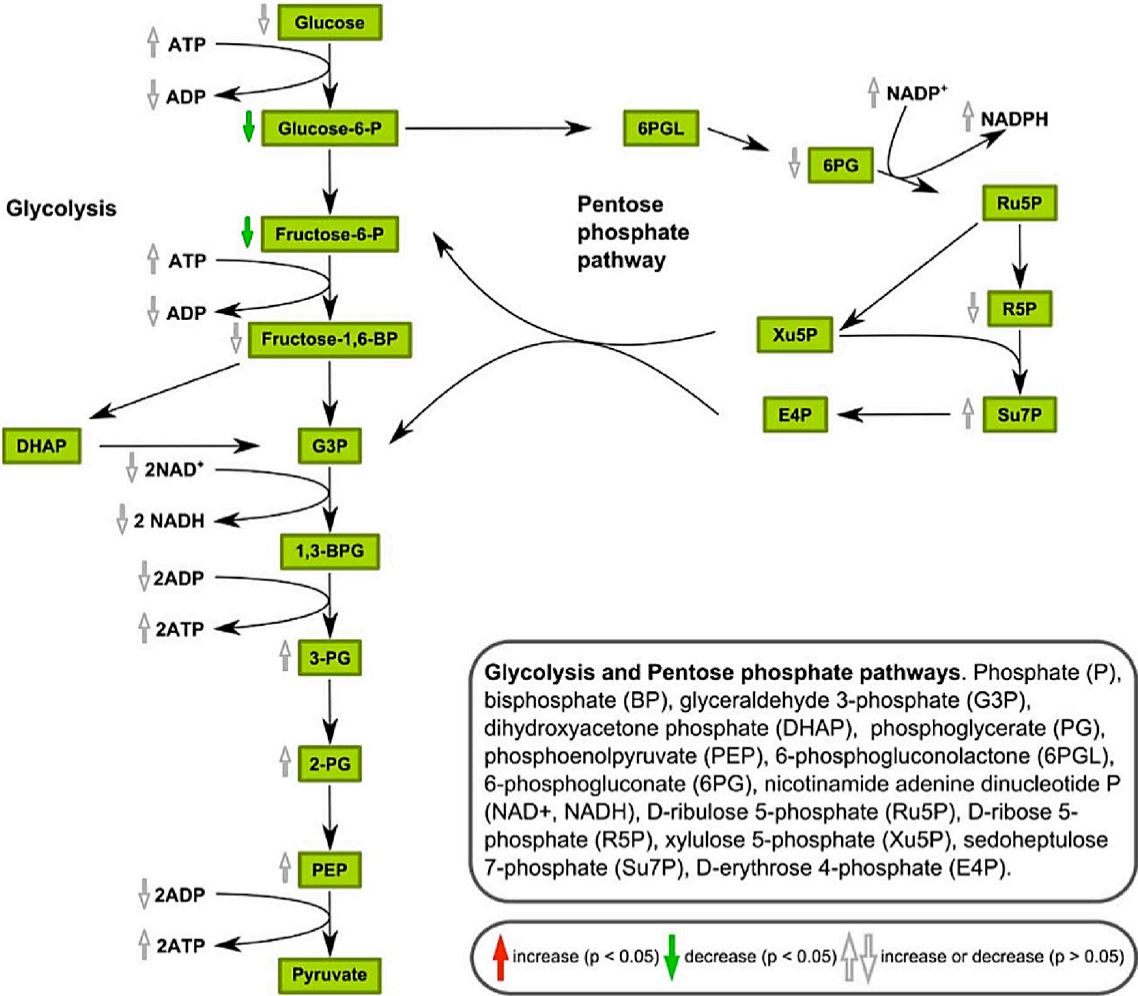

Figure S2. Changes in glycolysis and the pentose phosphate pathway (PPP) in Huh-7 macroH2A1 knockdown (KD) compared to control (CTL) cells. Red arrows indicate significant increases ( $P < 0.05$ ), green arrows indicate significant decreases ( $P < 0.05$ ), and white arrows indicate non-significant changes ( $P > 0.05$ ).

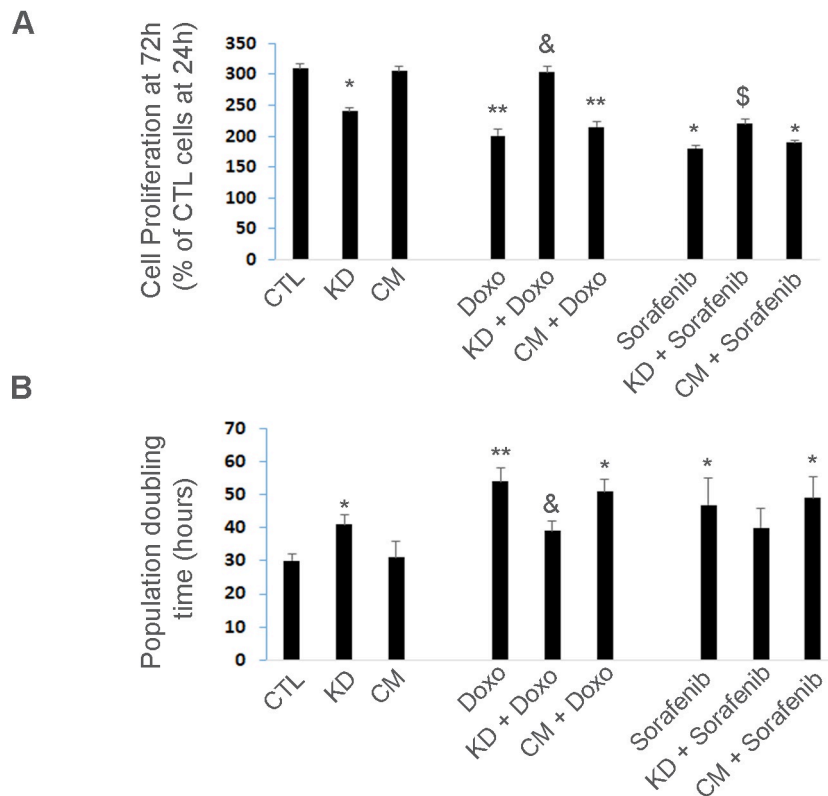

**Figure S3. HepG2 macroH2A1 KD cells do not confer chemoresistance to parental cells. A.** Three experimental conditions: control (CTL), KD and CTL cells plus KD conditioned medium (CM). C. MTT assay in CTL, KD or CTL + CM cells incubated with or without vehicle (DMSO), 2  $\mu$ M Doxorubicin (Doxo) or 1  $\mu$ M Sorafenib for 72 h. Data represent the mean cell proliferation  $\pm$  s.d. relative to CTL cells at 24 h. N=3. D. Population doubling time in CTL, KD or CTL + CM cells incubated with or without vehicle (DMSO), 2  $\mu$ M Doxorubicin (Doxo) or 1  $\mu$ M Sorafenib for 72 h. Data represent the mean cell proliferation  $\pm$  s.d. N = 3. \*P < 0.05, \*\* P < 0.01 relative to CTL; & P < 0.05 relative to Doxo; § P < 0.05 relative to Sorafenib.

## Supplemental Material

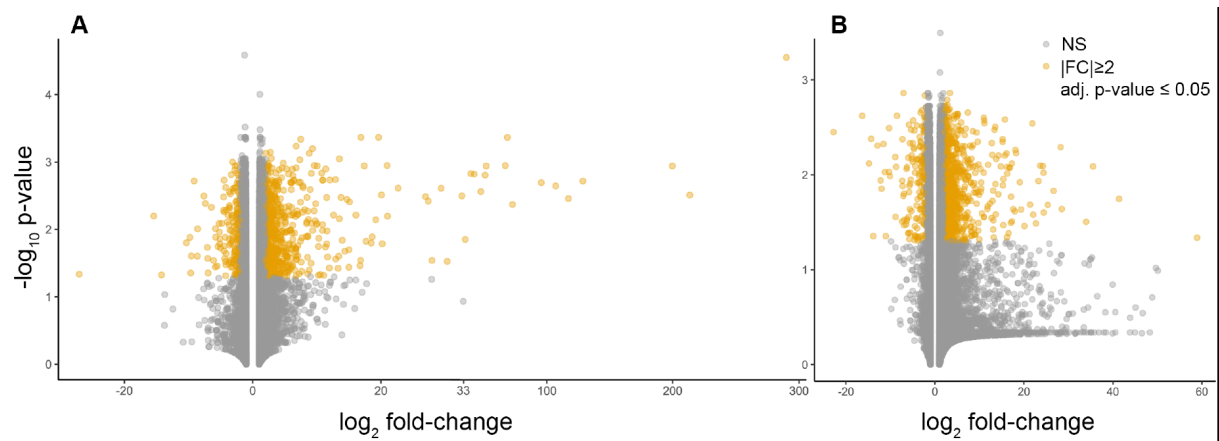

**Figure S4. Volcano plot representing differentially expressed genes between macroH2A1 KD versus control cells (A), and between conditioned media (CM) KD treated cells versus control Huh-7 cells. Orange dots: significant and differentially expressed genes. Grey dots: statistically nonsignificant (NS) expressed genes. 783 and 987 genes were significantly and differentially expressed ( $|FC| \geq 2$ ,  $\text{adj. } p\text{-value} \leq 0.05$ ) over a total number of 26439 screened genes, in macroH2A1 KD or CM KD versus control Huh-7 cells, respectively.**

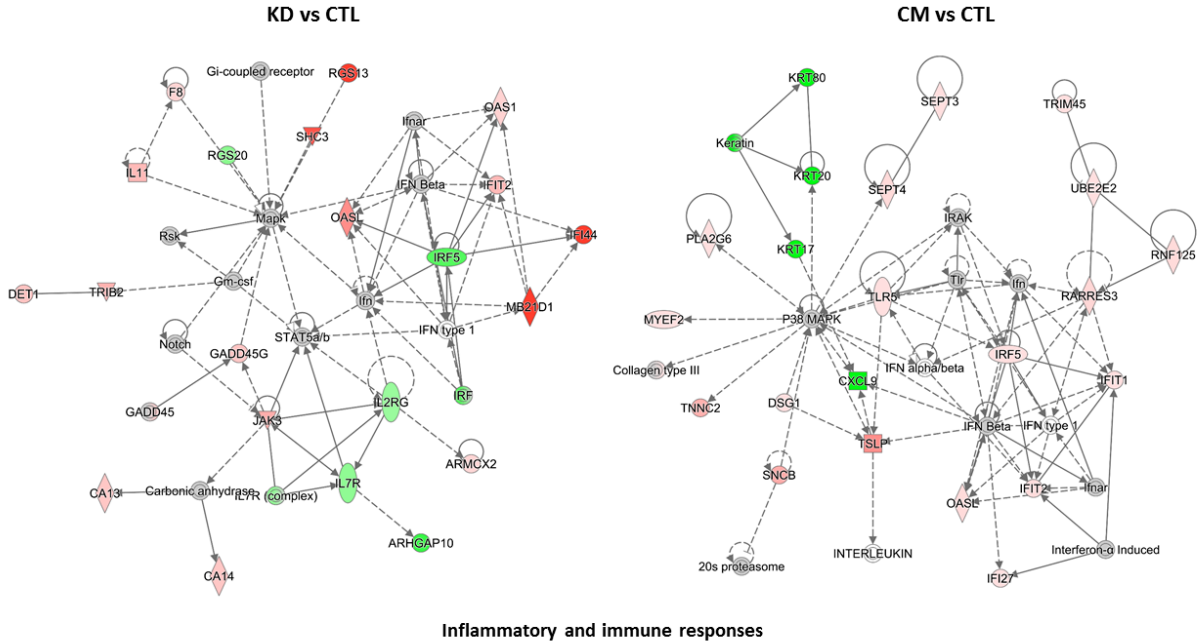

**Figure S5. Functional enrichment analysis of commonly and differentially expressed genes in control (CTL), macroH2A1 knockdown (KD) and conditioned media (CM) Huh-7 cells. C.** Networks of differentially expressed genes in KD vs CTL (left) and CM vs CTL (right) involved in the Inflammatory and Immune Responses functions. Over-expressed and down-regulated molecules are colored in red and green, respectively.

## Supplemental Material

**A**

|               |              |       |       |            |             |                |        |               |        |               |                |
|---------------|--------------|-------|-------|------------|-------------|----------------|--------|---------------|--------|---------------|----------------|
| POS           | POS          | NEG   | NEG   | ENA-78     | GCSF        | GM-CSF         | GRO    | GRO- $\alpha$ | I-309  | IL-1 $\alpha$ | IL-1 $\beta$   |
| POS           | POS          | NEG   | NEG   | ENA-78     | GCSF        | GM-CSF         | GRO    | GRO- $\alpha$ | I-309  | IL-1 $\alpha$ | IL-1 $\beta$   |
| IL-2          | IL-3         | IL-4  | IL-5  | IL-6       | IL-7        | IL-8           | IL-10  | IL-12 P40/p70 | IL-13  | IL-15         | INF- $\gamma$  |
| IL-2          | IL-3         | IL-4  | IL-5  | IL-6       | IL-7        | IL-8           | IL-10  | IL-12 P40/p70 | IL-13  | IL-15         | INF- $\gamma$  |
| MPC-1         | MCP-2        | MPC-3 | MCSF  | MDC        | MIG         | MIP-16         | RANTES | SCF           | SDF-1  | TARC          | TGF- $\beta$ 1 |
| MPC-1         | MCP-2        | MPC-3 | MCSF  | MDC        | MIG         | MIP-16         | RANTES | SCF           | SDF-1  | TARC          | TGF- $\beta$ 1 |
| TNF $\alpha$  | TNF- $\beta$ | EGF   | IGF-I | Angiogenin | OncostatinM | Thrombopoietin | VEGF   | PDGF BB       | Leptin | NEG           | POS            |
| TNF- $\alpha$ | TNF- $\beta$ | EGF   | IGF-I | Angiogenin | OncostatinM | Thrombopoietin | VEGF   | PDGF BB       | Leptin | NEG           | POS            |

**B**

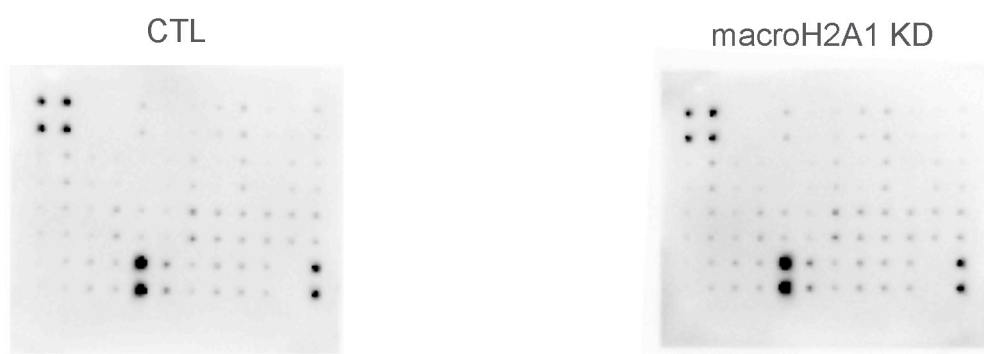

**Figure S6. Conditioned media (CM) from HepG2 macroH2A1 KD cells has similar cytokine/chemokine content to HepG2 control cells. A. 48 human cytokines/chemokines were analyzed in the Huh-7 control (CTL) and KD cell supernatants.**

## Supplemental Material

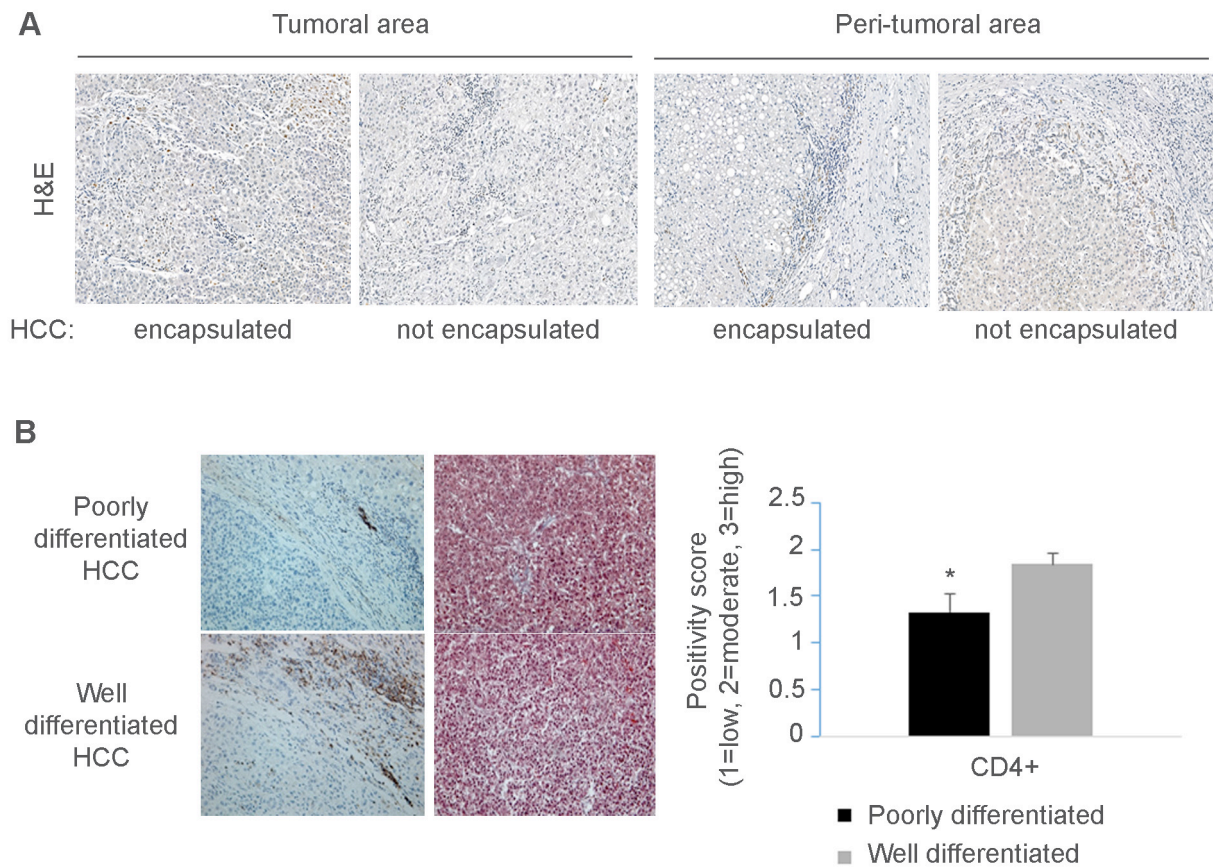

**Figure S7. HCC harboring low macroH2A1 expression displays decreased CD4(+) lymphocyte infiltration.** A. Representative hematoxylin & eosin (H&E) staining of encapsulated versus non-encapsulated Hepatocellular carcinoma (HCC) tumors from explanted livers of patients undergoing liver transplantation as in Figure 2. Magnification, 100 X. B. Immunohistochemical staining for CD4<sup>+</sup> cells and H&E staining on poorly-differentiated (n=18) and well-differentiated (n=16) HCC samples, from a previously characterized cohort [1]. The right panel shows a corresponding semi-quantitative evaluation of positivity scores (1=low, 2=moderate, 3=high) for CD4 staining for the same cases. \*p < 0.05 compared to well differentiated.



Supplemental Material

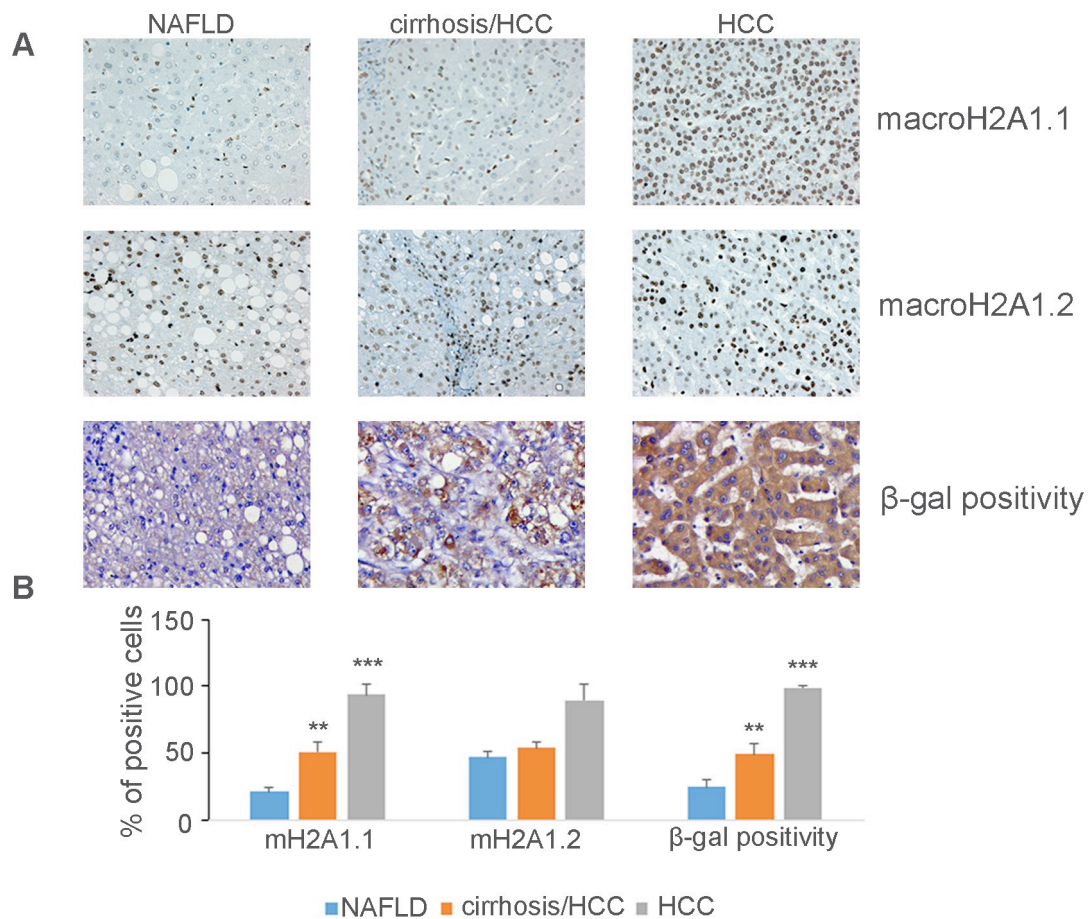

**Figure S8.** A. Representative pictures of macroH2A1.1, macroH2A1.2 and  $\beta$ -gal immunostaining of human liver samples with NAFLD, cirrhosis, and HCC (n = 10 per condition) [2, 3]. All HCC cells were highly positive for macroH2A1.1, macroH2A1.2 and  $\beta$ -gal; positivity of hepatocytes with NAFLD was significantly lower and was intermediate in viral cirrhosis. Magnification: 400 X. B. After performing quantitative analysis, the results were expressed in a semiquantitative scale (0, 0%; 1, 1%–33%; 2, 34%–66%; 3, 67%–100%). Data were expressed as means  $\pm$  SE. \*\*, P < 0.01 and \*\*\*, P < 0.001.

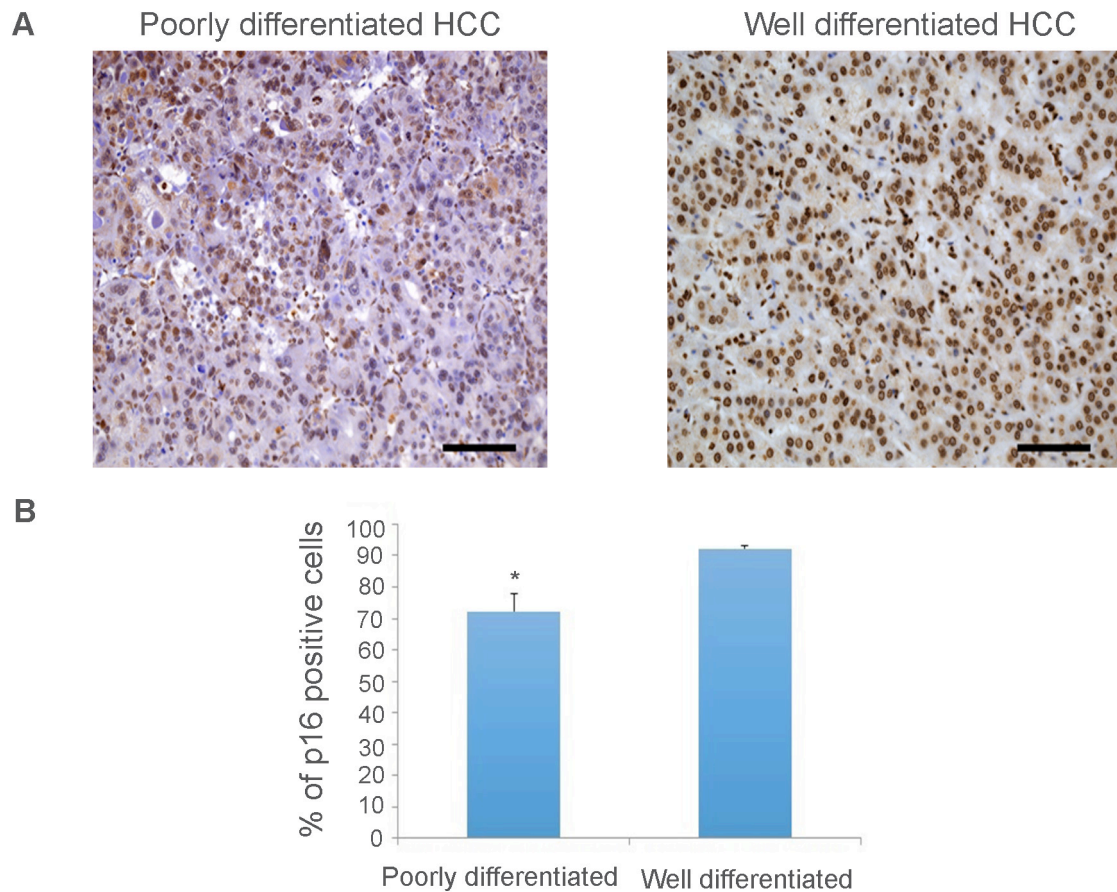

**Figure S9.** A. Representative immunohistochemical staining for p16 cells on poorly differentiated (n = 18) and well-differentiated (n = 16) HCC samples, from a previously characterized cohort [1]. After performing quantitative analysis, the results were expressed in a semiquantitative scale (0, 0%; 1, 1%–33%; 2, 34%–66%; 3, 67%–100%). Data were expressed as means  $\pm$  SE. \* $p < 0.05$  compared to well differentiated.

## Supplemental Material

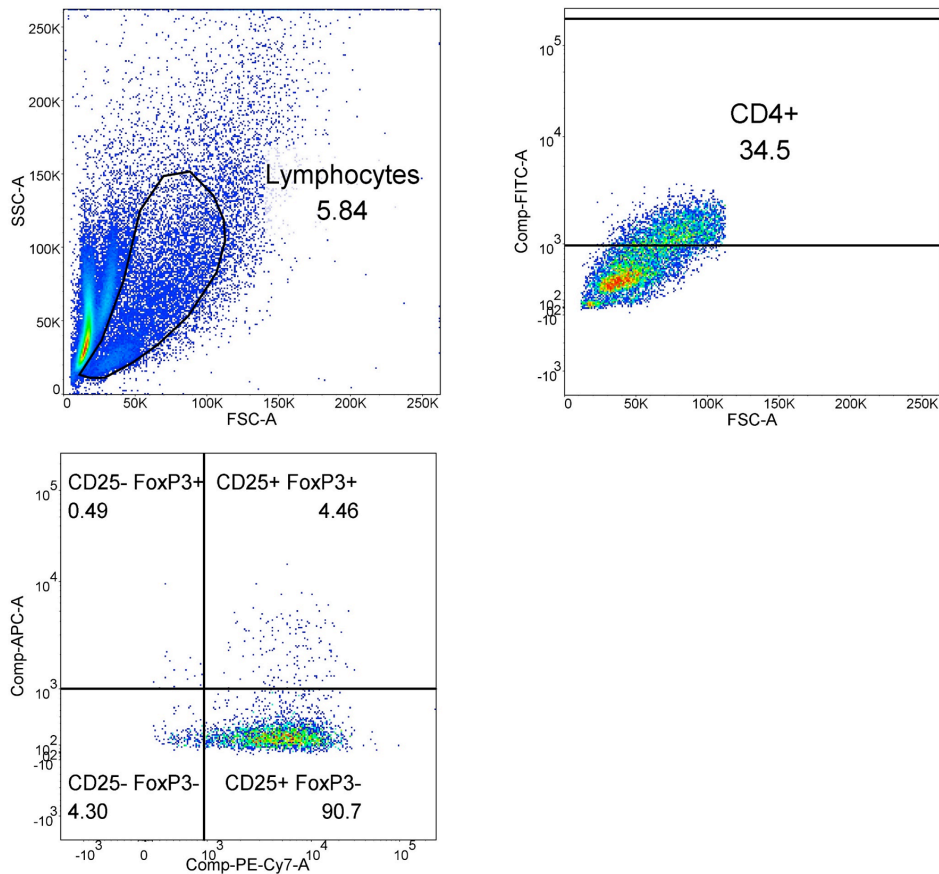

**Figure S10. MacroH2A1 KD conditioned media trigger  $CD4^+/CD25^+/FoxP3^+$  Treg cells expansion.** T cells isolated from peripheral blood mononuclear cells of healthy volunteers were exposed to the culture media as described in Figure 8 Legend. The Figure shows a representative flow cytometric plot. Cells were stained for Treg markers with antibody combination CD4/CD25/FoxP3 and gated for lymphocytes (SSC-A, FSC-A) (upper left panel) and for CD4<sup>+</sup> (upper right panel). Four populations were then gated: CD4<sup>+</sup>/CD25<sup>-</sup>/FoxP3<sup>-</sup>, CD4<sup>+</sup>/CD25<sup>-</sup>/FoxP3<sup>+</sup>, CD4<sup>+</sup>/CD25<sup>+</sup>/FoxP3<sup>-</sup> and CD4<sup>+</sup>/CD25<sup>+</sup>/FoxP3<sup>+</sup> cells (lower left panel).

## Supplemental Material

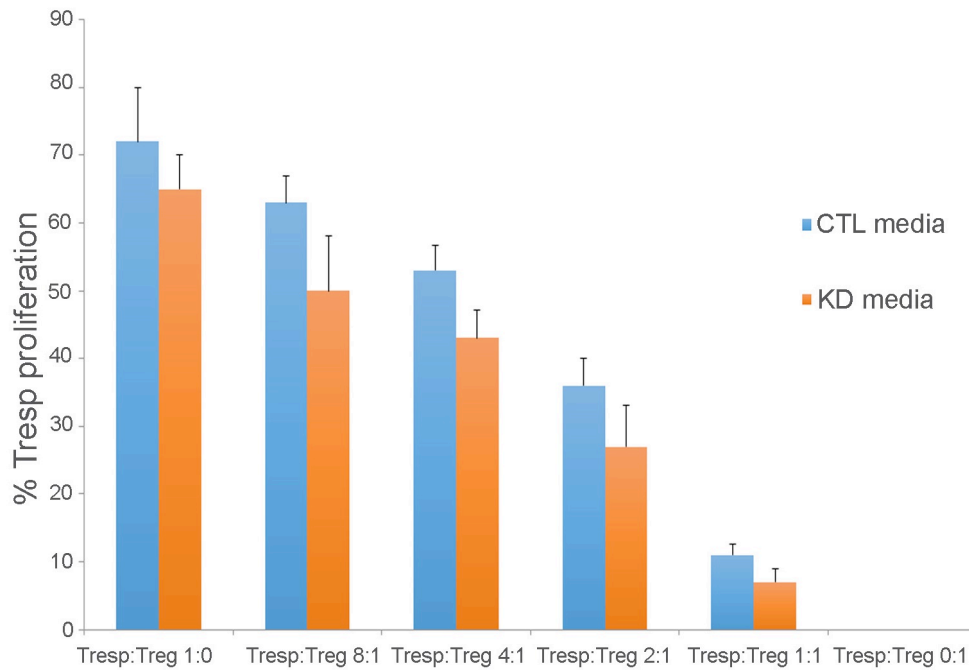

**Figure S11. CTL and macroH2A1 KD conditioned media trigger similar CD4<sup>+</sup>/CD25<sup>+</sup>/FoxP3<sup>+</sup> Treg cells functional activation.** The suppressing function was analyzed by CFSE-labeled CD4<sup>+</sup> CD25<sup>-</sup> T cells co-cultured with CD4<sup>+</sup> CD25<sup>+</sup> Tregs and Treg Suppression Inspector, which was composed of anti-biotin MACSiBead™ particles preloaded with biotinylated anti-CD2, anti-CD3, and anti-CD28 antibodies. After 4 days of culture, proliferation was measured based on CFSE signal.

### **Supplemental Tables**

*Supplemental Table 1.* Fold changes and unpaired Student's t-test of each individual metabolite and of each metabolic class.

Supplemental Material

| Class                   | Metabolite                                            | Fold change | Log <sub>2</sub> (fold change) | Student's t-test (p) |
|-------------------------|-------------------------------------------------------|-------------|--------------------------------|----------------------|
| AA                      | Serine                                                | 1.06        | 0.09                           | 6.78E-01             |
|                         | Proline                                               | 1.05        | 0.07                           | 6.13E-01             |
|                         | Valine                                                | 1.29        | 0.36                           | 4.87E-02             |
|                         | Threonine                                             | 0.93        | -0.11                          | 6.65E-01             |
|                         | Taurine                                               | 0.68        | -0.56                          | 1.61E-01             |
|                         | Isoleucine                                            | 0.99        | -0.02                          | 9.47E-01             |
|                         | Leucine                                               | 0.94        | -0.09                          | 6.71E-01             |
|                         | Asparagine                                            | 0.96        | -0.05                          | 8.48E-01             |
|                         | Glutamine                                             | 0.22        | -2.20                          | 2.69E-01             |
|                         | Methionine                                            | 0.87        | -0.20                          | 4.51E-01             |
|                         | Phenylalanine                                         | 1.28        | 0.36                           | 9.13E-02             |
|                         | Tyrosine                                              | 1.00        | 0.00                           | 9.97E-01             |
|                         | Tryptophan                                            | 1.14        | 0.19                           | 4.29E-01             |
|                         | Glutathione (reduced)                                 | 1.82        | 0.87                           | 1.97E-01             |
|                         | Glutathione (oxidized)                                | 0.10        | -3.36                          | 2.61E-01             |
|                         | S-Adenosylhomocysteine                                | 0.93        | -0.10                          | 9.51E-01             |
|                         | N-Acetylglutamic acid                                 | 1.44        | 0.53                           | 2.61E-01             |
| N-Acetyl-glutamine      | 0.37                                                  | -1.44       | 2.25E-01                       |                      |
| Pyroglutamic acid       | 0.78                                                  | -0.36       | 2.70E-01                       |                      |
| Hippuric acid           | 1.38                                                  | 0.47        | 1.96E-01                       |                      |
| Carbohydrates           | 2,3-bisphosphoglycerate                               | 2.00        | 1.00                           | 4.75E-01             |
|                         | 2-phosphoglycerate / 3-phosphoglycerate               | 1.11        | 0.15                           | 8.46E-01             |
|                         | 6-Phosphogluconate                                    | 0.07        | -3.86                          | 2.70E-01             |
|                         | D-Mannose 6-phosphate and 1D-myo-Inositol 3-phosphate | 0.16        | -2.61                          | 3.02E-02             |
|                         | D-Ribose 5-phosphate                                  | 0.12        | -3.12                          | 9.58E-02             |
|                         | Fructose 1,6-bisphosphate                             | 0.40        | -1.33                          | 3.85E-01             |
|                         | Fructose 6-phosphate                                  | 0.03        | -5.28                          | 1.80E-02             |
|                         | Glucose                                               | 0.68        | -0.56                          | 5.66E-02             |
|                         | Glucose-6-phosphate                                   | 0.20        | -2.30                          | 3.83E-02             |
|                         | Phosphoribosyl pyrophosphate                          | 0.18        | -2.44                          | 1.80E-01             |
|                         | Sedoheptulose                                         | 1.33        | 0.41                           | 3.78E-01             |
| Sorbitol                | 0.79                                                  | -0.34       | 3.99E-01                       |                      |
| Carboxylic acids        | 3-Hydroxyglutaric acid                                | 1.00        | 0.01                           | 9.81E-01             |
|                         | 4-Pyridoxic acid                                      | 1.54        | 0.63                           | 4.29E-02             |
|                         | 5-Methyltetrahydrofolic acid                          | 1.32        | 0.40                           | 3.78E-01             |
|                         | Citrate / iso-Citrate                                 | 0.92        | -0.13                          | 6.66E-01             |
|                         | Fumaric acid                                          | 0.87        | -0.20                          | 1.13E-01             |
|                         | Malate                                                | 0.86        | -0.22                          | 6.59E-02             |
|                         | N-Acetylneuraminic acid                               | 0.93        | -0.10                          | 7.96E-01             |
|                         | Orotic acid                                           | 1.19        | 0.25                           | 4.89E-01             |
|                         | Phosphoenolpyruvate                                   | 1.94        | 0.95                           | 4.51E-01             |
| Succinate               | 0.58                                                  | -0.79       | 6.79E-02                       |                      |
| Fatty acid ester        | Acetyl-coenzyme A                                     | 25.77       | 4.69                           | 3.15E-02             |
| Nucleosides             | 2'Deoxyinosine                                        | 0.79        | -0.34                          | 4.58E-01             |
|                         | Guanosine                                             | 0.29        | -1.81                          | 5.63E-02             |
|                         | Inosine                                               | 0.58        | -0.79                          | 1.24E-01             |
|                         | Uridine                                               | 0.99        | -0.02                          | 9.69E-01             |
|                         | Xanthosine                                            | 0.60        | -0.73                          | 4.24E-01             |
| Nucleotides             | Adenosine 5'-diphosphate                              | 0.61        | -0.71                          | 5.34E-01             |
|                         | ADP-Glucose                                           | 1.21        | 0.28                           | 2.49E-01             |
|                         | Adenosine 5'-monophosphate                            | 0.50        | -0.99                          | 5.36E-01             |
|                         | Adenosine 5'-triphosphate                             | 1.29        | 0.36                           | 2.65E-01             |
|                         | Cytidine 5'-triphosphate                              | 1.53        | 0.61                           | 4.26E-02             |
|                         | 2'-Deoxyguanosine 5'-triphosphate                     | 1.28        | 0.36                           | 2.83E-01             |
|                         | Guanosine 5'-diphosphate                              | 0.66        | -0.60                          | 5.27E-01             |
|                         | Guanosine 5'-triphosphate                             | 1.29        | 0.37                           | 1.99E-01             |
|                         | UDP-Glucose                                           | 0.93        | -0.11                          | 7.21E-01             |
|                         | Uracil                                                | 0.87        | -0.20                          | 2.99E-01             |
| Uridine 5'-triphosphate | 1.26                                                  | 0.33        | 3.13E-01                       |                      |
| Redox electron carriers | Flavin adenine dinucleotide                           | 0.70        | -0.51                          | 1.67E-01             |
|                         | Nicotinamide adenine dinucleotide                     | 0.91        | -0.14                          | 2.36E-01             |
|                         | Nicotinamide adenine dinucleotide reduced             | 0.28        | -1.82                          | 2.71E-01             |
|                         | Nicotinamide adenine dinucleotide phosphate           | 1.35        | 0.44                           | 1.31E-01             |
|                         | Nicotinamide adenine dinucleotide phosphate reduced   | 1.44        | 0.53                           | 1.18E-01             |

Supplemental Table 2. Clinic-pathological features of 20 patients (N=10 with encapsulated HCC + N=10 with not encapsulated/infiltrative HCC) undergoing liver transplantation for HCC in the period 1995-2000 at the Royal Free Hospital (London, UK), included in this study. Demographic information and HCC etiology is shown for encapsulated versus non-

## Supplemental Material

encapsulated cases. Viral hepatitis: HBC, HCV, HBV/HCV, HBC/HDV. Cryptogenic: of unknown origin; Alpha 1 T: alpha-1-antitrypsin deficiency.

| <b>HCC</b>       | <b>N</b> | <b>Male gender</b> | <b>Age</b> | <b>Viral hepatitis</b> | <b>Alcohol</b> | <b>Viral hepatitis + alcohol</b> | <b>Cryptogenic</b> | <b>Alpha 1 T</b> |
|------------------|----------|--------------------|------------|------------------------|----------------|----------------------------------|--------------------|------------------|
| Not encapsulated | 10       | 100%               | 53.9±8.3   | 3                      | 3              | 2                                | 1                  | 1                |
| Encapsulated     | 10       | 70%                | 53.6±7.7   | 7                      | 2              | 0                                | 1                  | 0                |

## References

1. Govaere O, Komuta M, Berkers J, Spee B, Janssen C, de Luca F, et al. Keratin 19: a key role player in the invasion of human hepatocellular carcinomas. *Gut*. 2014; 63: 674-85.
2. Borghesan M, Fusilli C, Rappa F, Panebianco C, Rizzo G, Oben JA, et al. DNA Hypomethylation and Histone Variant macroH2A1 Synergistically Attenuate Chemotherapy-Induced Senescence to Promote Hepatocellular Carcinoma Progression. *Cancer research*. 2016; 76: 594-606.
3. Rappa F, Greco A, Podrini C, Cappello F, Foti M, Bourgoïn L, et al. Immunopositivity for histone macroH2A1 isoforms marks steatosis-associated hepatocellular carcinoma. *PloS one*. 2013; 8: e54458.
